# Supplementary material
Source: PubMed Central journal article supplement (PMC7254789)
Supplement: ao0c01527_si_001.pdf [file ao0c01527_si_001.pdf]

## Supporting Information

### **Preparation of biomass-based carbon dots with aggregation luminescence enhancement from hydrogenated rosin for biological imaging and detection of Fe<sup>3+</sup>**

Jundan Zhou <sup>†,1</sup>, Min Ge <sup>†,1</sup>, Youqi Han<sup>†</sup>, Jiaxin Ni<sup>†</sup>, Xun Huang<sup>†</sup>, Shiyan Han<sup>†\*</sup>, Zhibin Peng<sup>‡</sup>, Yudong Li<sup>†</sup>, Shujun Li<sup>†\*</sup>

<sup>†</sup> Key Laboratory of Bio-based Material Science and Technology, Ministry of Education, Northeast Forestry University, Harbin 150040, China

<sup>‡</sup> Department of Orthopaedic Surgery, The First Affiliated Hospital of Harbin Medical University, Harbin 150040, China

<sup>1</sup>The first two authors contributed equally to this work.

#### **Corresponding author**

\* E-mail: hanshiyan80@163.com (Shiyan Han)

\* E-mail: lishujun@nefu.edu.cn (Shujun Li)

#### **ORCID**

Shiyan Han: 0000-0003-3999-6450

Shujun Li: 0000-0002-3836-5350

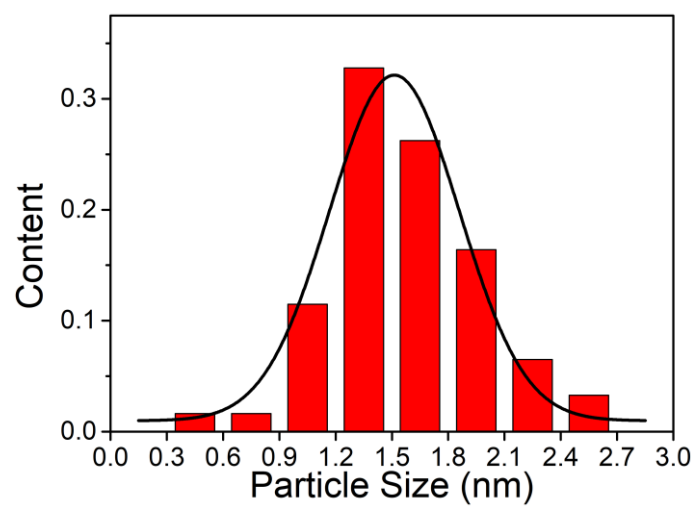

**Figure S1.** Size distribution histograms of hr-CDs.

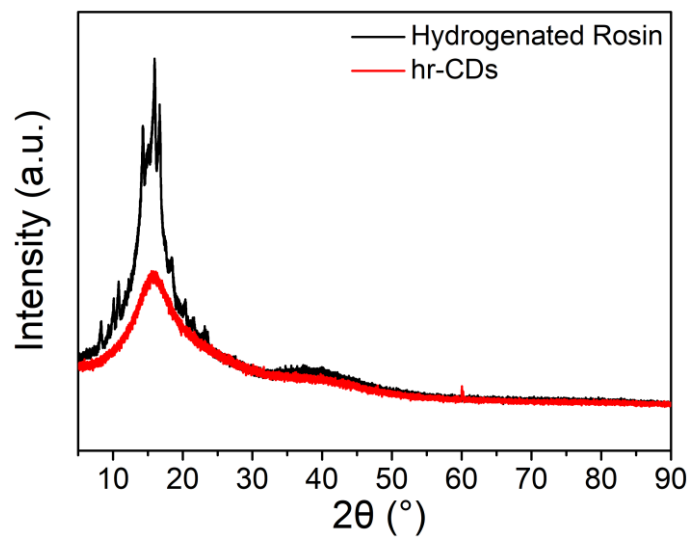

**Figure S2.** XRD of hr-CDs and hydrogenated rosin.

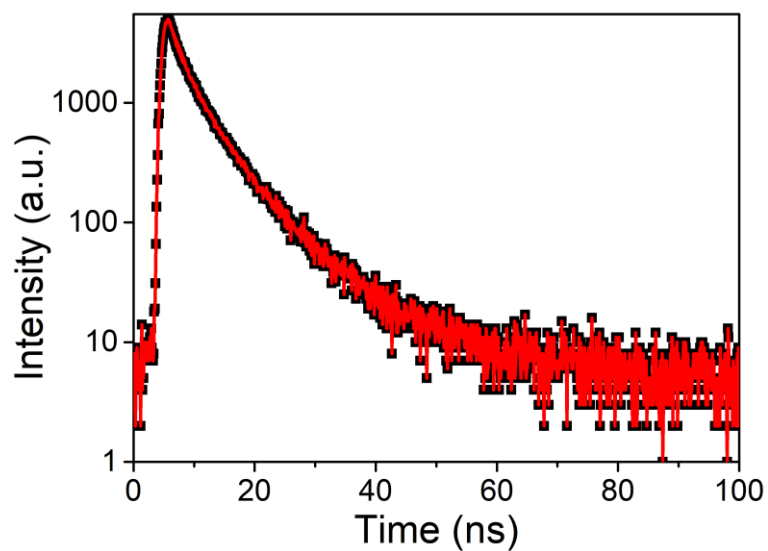

**Figure S3.** FL decay spectrum and fitted curves of hr-CDs solutions.

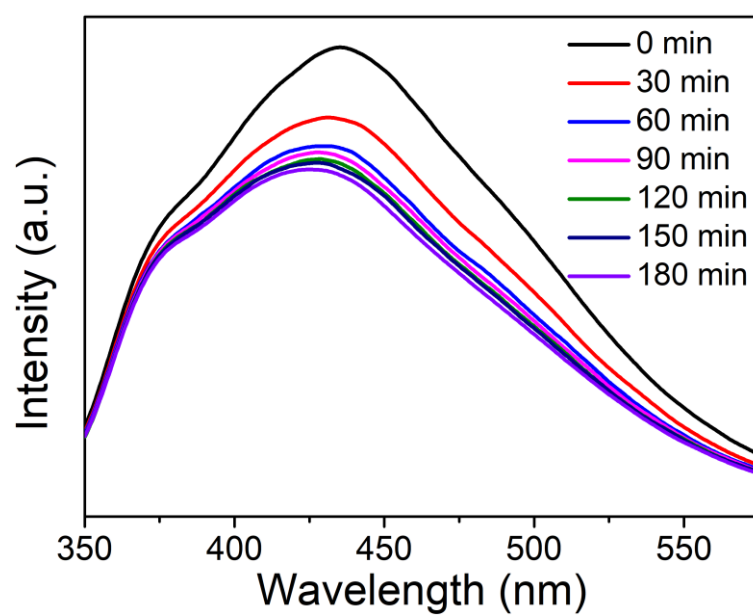

**Figure S4.** Fluorescence spectra and fluorescence intensity of aqueous solution of hr-CDs (10  $\mu\text{g/mL}$ ) after irradiation with UV lamp (200  $\text{mW/cm}^2$ ) for different periods of time.

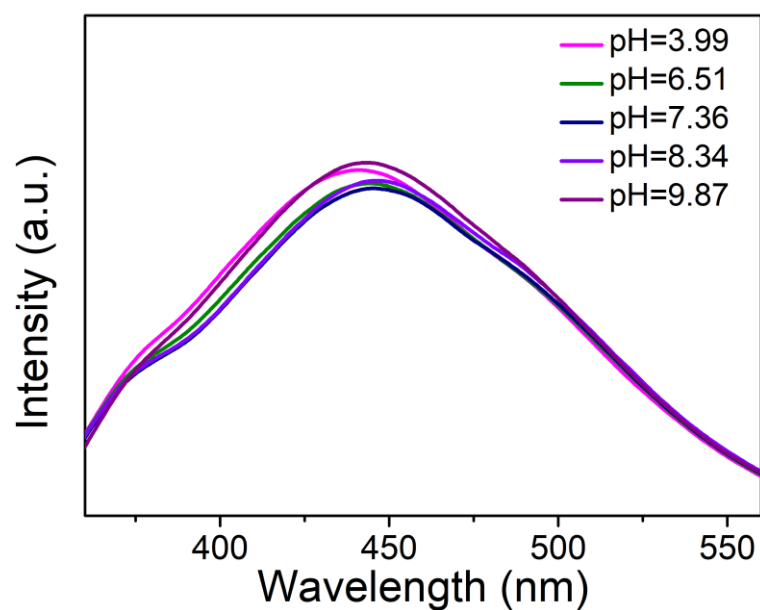

**Figure S5.** Fluorescence spectra of aqueous solutions of hr-CDs (10  $\mu\text{g/mL}$ ) at different pH.

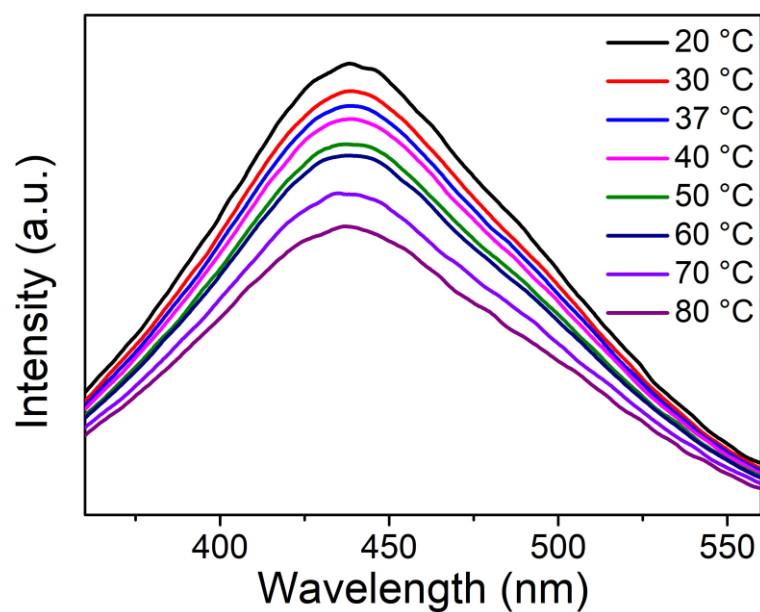

**Figure S6.** Fluorescence spectra of aqueous solutions of hr-CDs (20  $\mu\text{g/mL}$ ) at different temperatures.

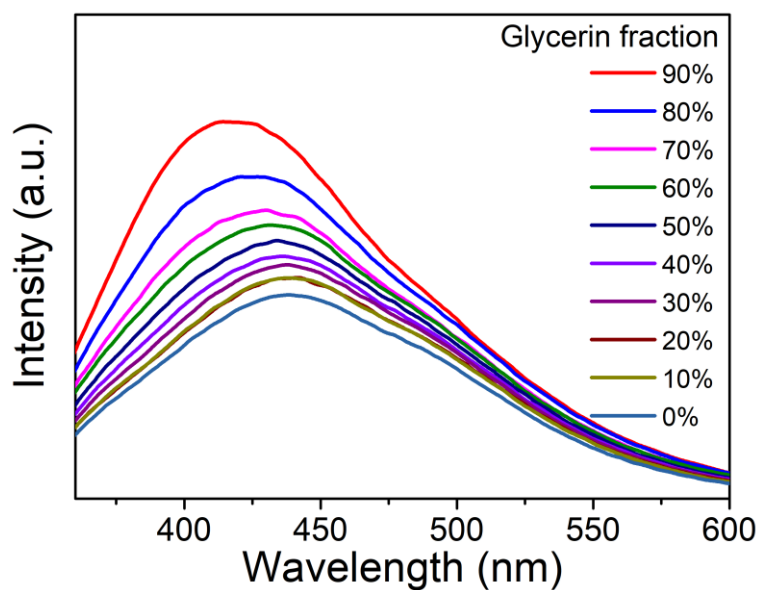

**Figure S7.** Fluorescence spectra of solutions of hr-CDs (20 µg/mL) in different mixtures of water and glycerol.

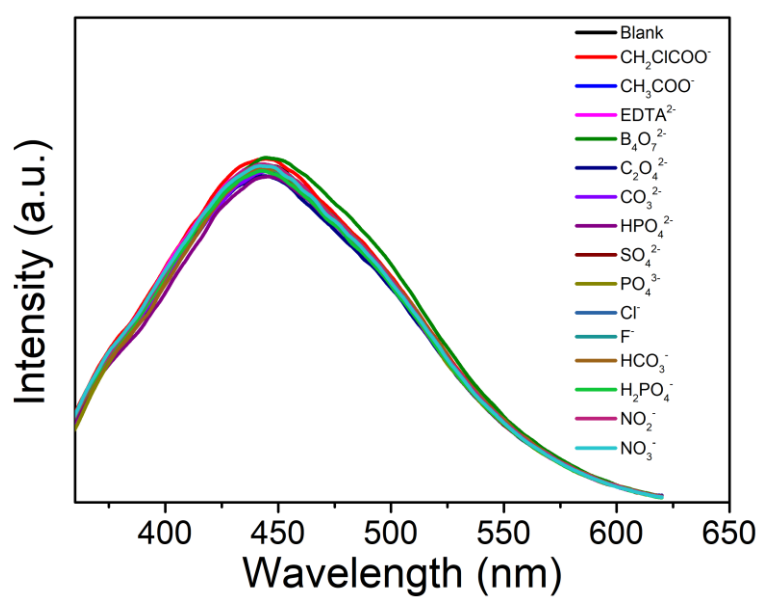

**Figure S8.** Fluorescence spectra of aqueous solution of hr-CDs (20 µg/mL) on addition of different anionic.

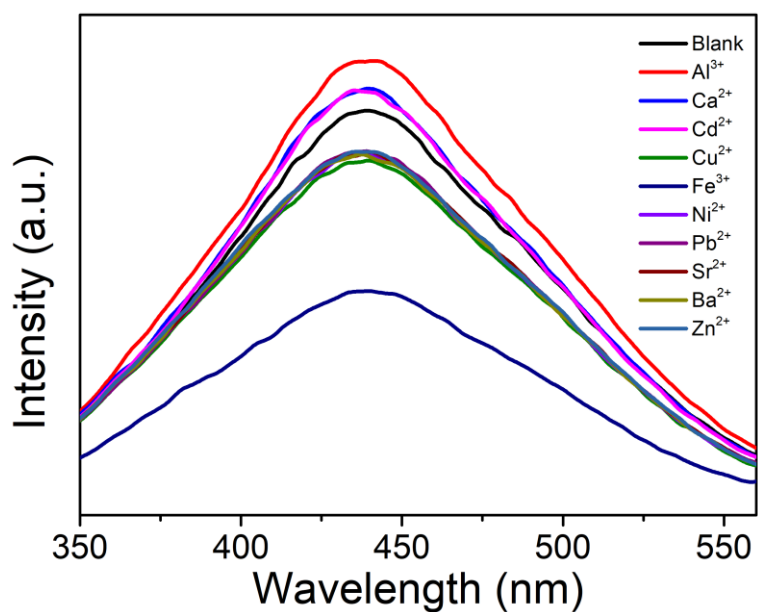

**Figure S9.** Fluorescence spectra of aqueous solution of hr-CDs (20 µg/mL) on addition of different cationic.

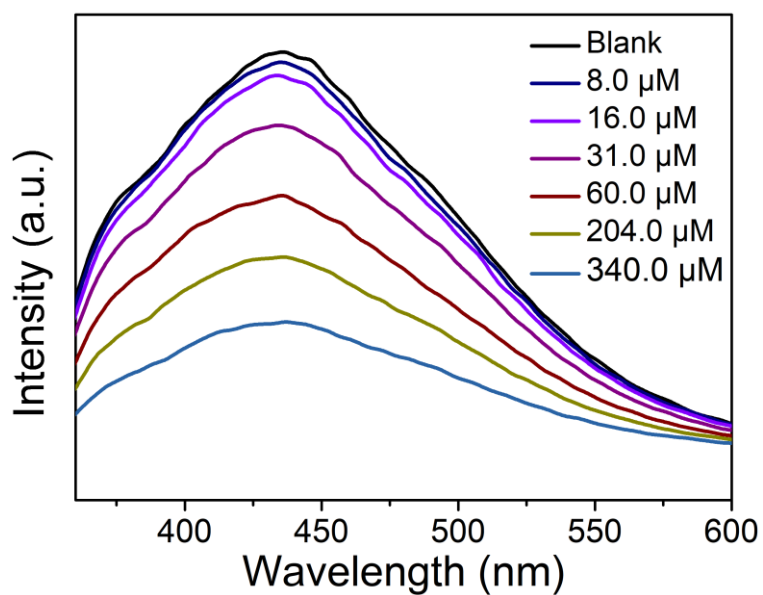

**Figure S10.** Fluorescence spectra of aqueous solution of hr-CDs (20 µg/mL) in the presence of different concentrations of Fe<sup>3+</sup>.

**Table S1. Certificated of Analysis to Hydrogenated Rosin**

| No.        | Items                     |               | Specification             | Analysis Result | Conclusion |
|------------|---------------------------|---------------|---------------------------|-----------------|------------|
| 1          | Coler Lovibond            | Yellow<br>Red | $\leq 12.0$<br>$\leq 1.4$ | 6<br>0.7        | passed     |
| 2          | Coler Lovibond(R&B), °C   |               | $\geq 72.0$               | 82.1            | passed     |
| 3          | Acid Value, mgKOH/g       |               | $\geq 162.0$              | 170.7           | passed     |
| 4          | Abietic Acid. %           |               | $\leq 2.00$               | 1.00            | passed     |
| 5          | Dehydroabietic Acid. %    |               | $\leq 10.0$               | 7.1             | passed     |
| 6          | Tetrahydroabietic Acid. % |               | $\geq 30.0$               | 39.8            | passed     |
| Conclusion |                           |               | passed                    |                 |            |

The table was provided by the supplier.
